# Supplementary material
Source: PubMed Central journal article supplement (PMC4272651)

**Figure legends.**

**Figure 1A-C.** Kaplan-Meier curves for overall survival, cancer-specific survival, and time to diagnosis of relapse.

**Figure 2A-C.** Kaplan-Meier curves for propensity matched overall survival, cancer-specific survival, and time to diagnosis of relapse.

**Online Supplemental Figure 1. Overall CONSORT diagram for surveillance imaging after resection for pathologic Stage I lung cancer.**

**Online Supplemental Figure 2.** Kaplan-Meier curves for overall survival based on treating surgeon.

**Online Supplemental Figure 3.** Consort Diagram of Diagnosis, Treatment, and Survival of Successive Malignancy Utilizing CT or CXR for Postoperative Surveillance. (There are 8 CT patients and 6 CXR patients who had no treatment, refused or had unknown treatment status).

**Online Supplemental Table 1.** Recent guidelines for radiographic surveillance following resection for NSCLC.<sup>9,11-13</sup>

| Agency (Year)                                                  | Recommendations                                                                                                                                                         |
|----------------------------------------------------------------|-------------------------------------------------------------------------------------------------------------------------------------------------------------------------|
| American Association for Thoracic Surgery (2012) <sup>11</sup> | High-resolution CT for first 4 years (with baseline CT at 6 months and scans at least every 6 months for first 3 years), then annual low-density CT annually thereafter |
| American College of Chest Physicians (2013) <sup>9</sup>       | Chest CT every 6 months for 2 years, annually thereafter                                                                                                                |
| European Society of Medical Oncology (2010) <sup>12</sup>      | CT every 6 months for 2 years, annually thereafter                                                                                                                      |
| National Comprehensive Cancer Network (2012) <sup>13</sup>     | Helical chest CT with or without contrast every 6-12 months for 2 years, chest CT without contrast annually thereafter                                                  |

**Online Supplemental Table 2.** Findings from surveillance studies of NSCLC survivors.<sup>4-</sup>

6,14-20

| Reference                                    | Patients and Comparison                                                                             | Findings                                                                                                                                                           |
|----------------------------------------------|-----------------------------------------------------------------------------------------------------|--------------------------------------------------------------------------------------------------------------------------------------------------------------------|
| Benamore et al. (Canada, 2007) <sup>15</sup> | n = 75, stage IIB-III, routine CXR and CT vs. routine CXR with CT done on clinical suspicion        | No significant difference in disease-free or overall survival                                                                                                      |
| Chiu et al. (Taiwan, 2003) <sup>16</sup>     | n = 73, stage I-IV, follow-up with concurrent CXR and low-dose CT (LDCT)                            | Majority of relapses were detected by LDCT. LDCT more sensitive than CXR                                                                                           |
| Hanna et al. (Canada, 2014) <sup>14</sup>    | n = 271, stage I-IV, follow-up with concurrent CXR and minimal-dose CT (MnDCT)                      | Majority of relapses were detected asymptotically. MnDCT more sensitive than CXR. Asymptomatic relapses had greater rate of curative treatment and longer survival |
| Lamont et al. (USA, 2002) <sup>6</sup>       | n = 124, stage I-III, follow-up with CT and CXR                                                     | Majority of relapses were detected by follow-up CT                                                                                                                 |
| Lou et al. (USA, 2013) <sup>5</sup>          | n = 1294, stage I-II, follow-up with CT                                                             | Majority of relapses were detected by follow-up CT                                                                                                                 |
| Nakamura et al. (Japan, 2010) <sup>17</sup>  | n = 1389, stage I-III B, follow-up by pulmonologists with CXR and CT vs. thoracic surgeons with CXR | No significant difference in survival for stage I, CXR/CT group had longer survival for stage II-III                                                               |
| Virgo et al. (USA, 1995) <sup>18</sup>       | n = 182, stage I-III A, intensive vs. non-intensive follow-up                                       | No significant difference in survival                                                                                                                              |
| Walsh et al. (USA, 1995) <sup>4</sup>        | n = 358, stage I-III B                                                                              | Asymptotically detected relapses not associated with longer survival                                                                                               |
| Westeel et al. (France,                      | n = 192, stage I-IV, follow-up with CXR, CT and bronchoscopy                                        | Asymptotically detected relapses associated with longer survival                                                                                                   |

---

2000)<sup>19</sup>

Younes et al. n = 130, stage I-III B, routine CXR No significant difference in disease-  
(Brazil, 1999)<sup>20</sup> and CT vs. symptom-prompted free or overall survival  
follow-up

---

ACCEPTED MANUSCRIPT

**Online Supplemental Table 3.** Regression analysis for cancer-specific survival.

| <b>Covariate</b>                      | <b>Hazard Ratio</b> | <b>95% CI</b> | <b>p value</b> |
|---------------------------------------|---------------------|---------------|----------------|
| Imaging (CXR vs. CT)                  | 0.686               | 0.396 – 1.187 | 0.178          |
| Age                                   | 1.041               | 1.015 – 1.069 | 0.002          |
| Charlson index                        | 1.282               | 1.030 – 1.595 | 0.026          |
| Resection (sublobar vs. non-sublobar) | 1.893               | 1.040 – 3.443 | 0.037          |
| Tumor T-stage (1 vs. 2a)              | 0.719               | 0.379 – 1.361 | 0.311          |
| Tumor size                            | 1.032               | 0.774 – 1.375 | 0.831          |
| Histology (non-BAC vs. BAC)           | 1.863               | 0.738 – 4.702 | 0.188          |
| Adjuvant therapy (absent vs. present) | 0.633               | 0.321 – 1.246 | 0.186          |
| Gender (male vs. female)              | 1.078               | 0.663 – 1.753 | 0.762          |
| Race (non-Caucasian vs. Caucasian)    | 0.873               | 0.368 – 2.069 | 0.757          |

**Online Supplemental Table 4.** Matched groups from propensity score analysis. (C-statistic 0.640).

| Characteristic                 | CT (n = 174)    | CXR (n = 174)   | p value |
|--------------------------------|-----------------|-----------------|---------|
| Age (mean $\pm$ SD)            | 66 $\pm$ 10     | 68 $\pm$ 10     | 0.134   |
| Charlson index (mean $\pm$ SD) | 0.90 $\pm$ 0.94 | 0.89 $\pm$ 1.01 | 0.956   |
| T2a tumor                      | 56 (32%)        | 47 (27%)        | 0.291   |
| Resection (sublobar)           | 33 (19%)        | 33 (19%)        | 1.0     |
| Adjuvant therapy               | 10 (6%)         | 10 (6%)         | 1.0     |

**Online Supplemental Table 5.** Theoretical Sample Size Calculation for a Clinical Trial of Stage IA or Stage IIIA Non-Small Cell Lung Cancer (NSCLC) Based on 3-Year Accrual and Additional 5-year Follow-up

| Median survival in control group | Power | Assumed improvement in median survival | Sample size per group | Assuming 10% attrition | Assuming 20% attrition |
|----------------------------------|-------|----------------------------------------|-----------------------|------------------------|------------------------|
| 119*                             | 0.8   | 20%                                    | 1380                  | 1534                   | 1725                   |
| 119*                             | 0.9   | 20%                                    | 1847                  | 2053                   | 2309                   |
| <sup>#</sup><br>23               | 0.8   | 20%                                    | 464                   | 516                    | 580                    |
| <sup>#</sup><br>23               | 0.9   | 20%                                    | 621                   | 690                    | 863                    |

\*Median Survival Pathologic Stage IA NSCLC

<sup>#</sup>Median Survival Pathologic Stage IIIA NSCLC

(Median survival based on Goldstraw et al. The IASLC Lung Cancer Staging Project: proposals for the revision of the TNM stage groupings in the forthcoming (seventh) edition of the TNM Classification of malignant tumours. J Thorac Oncol. 2007 Aug;2(8):706-14.)

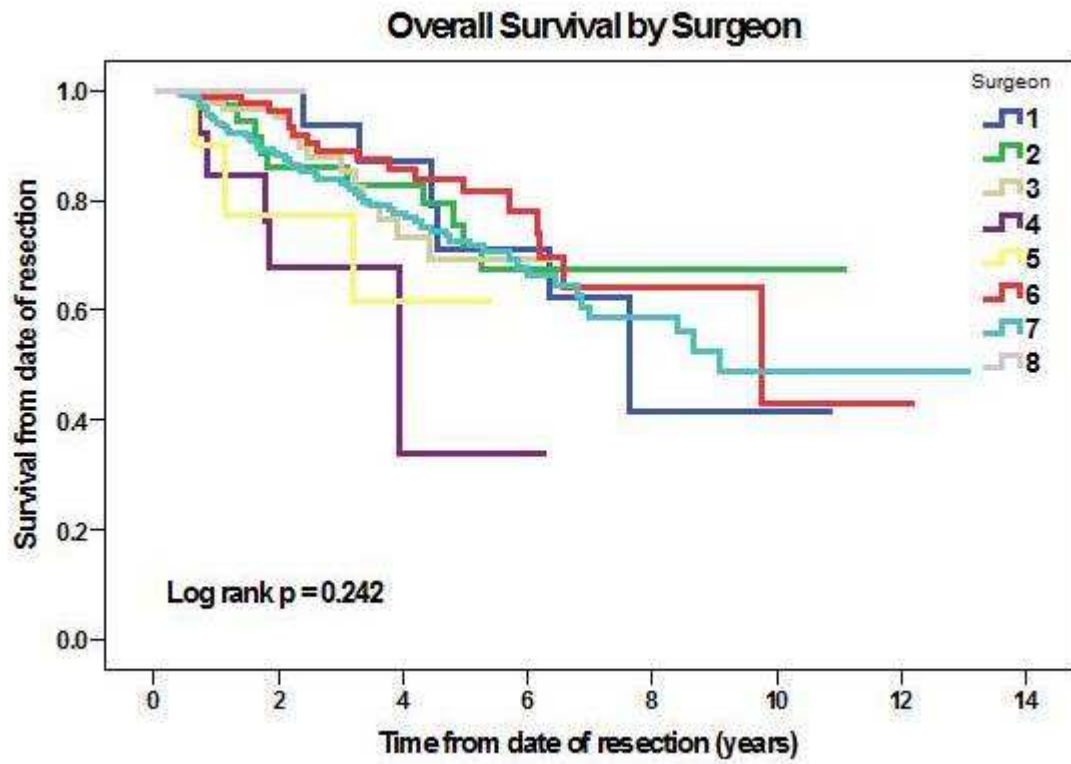

ACCEPTED MA



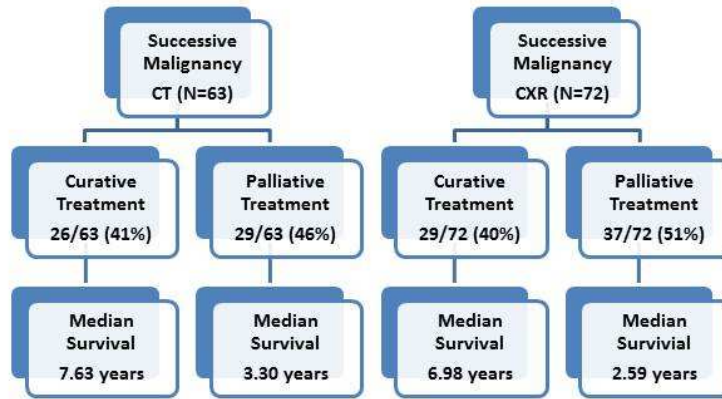

ACCEPTED MANUSCRIPT

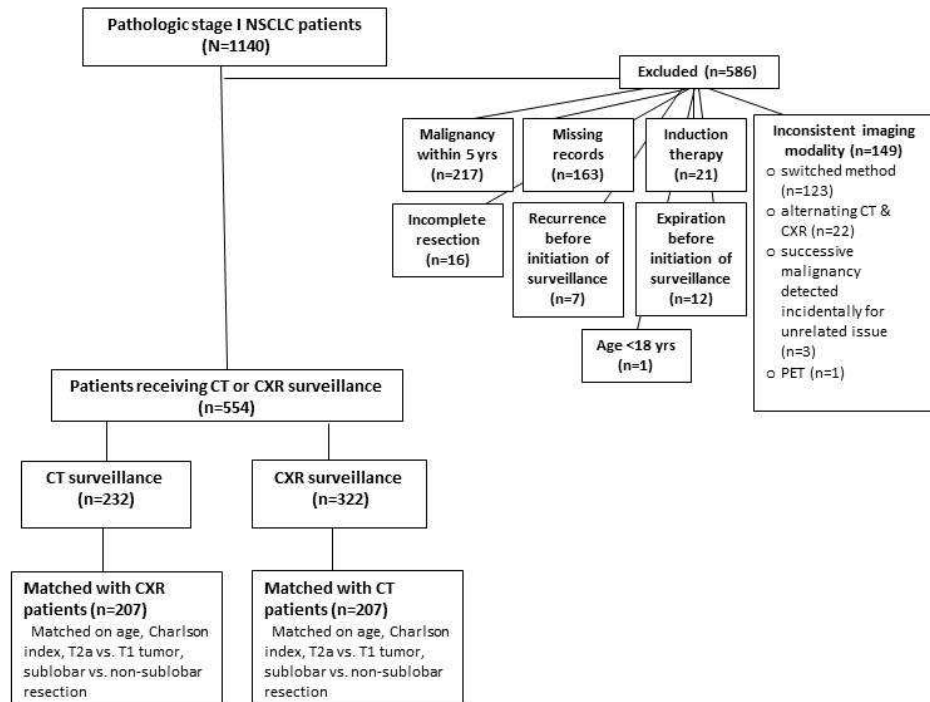

Supplement: NIHMS620071-supplement-supplement_1.pdf [file NIHMS620071-supplement-supplement_1.pdf]
